# Supplementary material for: Aryl hydrocarbon receptor nuclear translocator limits the recruitment and function of regulatory neutrophils against colorectal cancer by regulating the gut microbiota
Source: Springer Nature journal article supplement (doi:10.1186/s13046-023-02627-y), 2023-03-01
Supplement: MOESM1 [file 24080158]

**Supplementary Table.1 Primer sequences used for real-time PCR assays**

|               | Forward primer                | Reverse primer                 |
|---------------|-------------------------------|--------------------------------|
| <i>Arnt</i>   | 5'-TCTCCCTCCCAGATGATGAC-3'    | 5'-CAATGTTGTGTCGGGAGATG-3'     |
| <i>Ahr</i>    | 5'-CTGGTTGTCACAGCAGATGCCT-3'  | 5'-CGGTCTTCTGTATGGATGAGCTC-3'  |
| <i>Ccl3</i>   | 5'-ACTGCCTGCTGCTTCTCCTACA-3'  | 5'-ATGACACCTGGCTGGGAGCAAA-3'   |
| <i>Ccl5</i>   | 5'-CCTGCTGCTTTGCCTACCTCTC-3'  | 5'-ACACACTTGGCGGTTCCCTTCGA-3'  |
| <i>Cxcl1</i>  | 5'-GCACCCAAACCGAAGTCATAG-3'   | 5'-AGAAGCCAGCGTTCACCAGA-3'     |
| <i>Cxcl2</i>  | 5'-GCCCAGACAGAAGTCATAGCC-3'   | 5'-CTCCTCCTTTCCAGGTCAGTTA-3'   |
| <i>Ahrr</i>   | 5'-ACATACGCCGGTAGGAAGAGA-3'   | 5'-GGTCCAGCTCTGTATTGAGGC-3'    |
| <i>Cyp1a1</i> | 5'-CATCACAGACAGCCTCATTGAGC-3' | 5'-CTCCACGAGATAGCAGTTGTGAC-3'  |
| <i>Cyp1a2</i> | 5'-CATCCCCCACAGCACAACGA-3'    | 5'-GGTAAGAAACCGCTCTGGGC-3'     |
| <i>Cyp1b1</i> | 5'-GCCACTATTACGGACATCTTCGG-3' | 5'-ACAACCTGGTCCAACCTCAGCCT-3'  |
| <i>Cox2</i>   | 5'-GCGACATACTCAAGCAGGAGCA-3'  | 5'-AGTGGTAACCGCTCAGGTGTTG-3'   |
| <i>Hprt</i>   | 5'-CTGGTGAAAAGGACCTCTCGAAG-3' | 5'-CCAGTTTCACTAATGACACAAACG-3' |
